# Supplementary material for: A common haplotype of interferon regulatory factor 5 (IRF5) regulates splicing and expression and is associated with increased risk of systemic lupus erythematosus
Source: Springer Nature journal article supplement (doi:10.1038/ng1782), 2006-04-16
Supplement: 41588_2006_BFng1782_MOESM1_ESM.pdf [file 41588_2006_BFng1782_MOESM1_ESM.pdf]

**Supplementary Table 1. Genotypic association of rs2004640 with SLE**

|           | Genotype | Cases                | Frequency | Controls | Frequency |            | OR (95%CI)                   | $\chi^2$ | P <sup>a</sup>           |
|-----------|----------|----------------------|-----------|----------|-----------|------------|------------------------------|----------|--------------------------|
|           |          | N <sup>b</sup> = 284 |           | N = 279  |           |            |                              |          |                          |
| Argentina | GG       | 65                   | 0.23      | 90       | 0.32      |            |                              |          |                          |
|           | GT       | 129                  | 0.45      | 133      | 0.48      | GT v GG    | 1.34 (0.90-2.00)             | 2.1      | 0.1485                   |
|           | TT       | 90                   | 0.32      | 56       | 0.20      | TT v GG    | 2.23 (1.41-3.52)             | 11.7     | 0.0006                   |
|           |          |                      |           |          |           | TT v GT+GG | 1.85 (1.26-2.71)             | 9.9      | 0.0017                   |
|           |          | N = 444              |           | N = 541  |           |            |                              |          |                          |
| Spain     | GG       | 82                   | 0.18      | 112      | 0.21      |            |                              |          |                          |
|           | GT       | 165                  | 0.37      | 269      | 0.50      | GT v GG    | 0.84 (0.59-1.18)             | 1.0      | 0.3137                   |
|           | TT       | 197                  | 0.44      | 160      | 0.30      | TT v GG    | 1.68 (1.18-2.39)             | 8.4      | 0.0037                   |
|           |          |                      |           |          |           | TT v GT+GG | 1.90 (1.46-2.47)             | 23.1     | 1.6 x 10 <sup>-6</sup>   |
|           |          | N = 208              |           | N = 254  |           |            |                              |          |                          |
| Sweden    | GG       | 25                   | 0.12      | 47       | 0.18      |            |                              |          |                          |
|           | GT       | 106                  | 0.51      | 130      | 0.51      | GT v GG    | 1.53 (0.89-2.65)             | 2.3      | 0.1257                   |
|           | TT       | 77                   | 0.37      | 77       | 0.30      | TT v GG    | 1.88 (1.05-3.35)             | 4.6      | 0.0315                   |
|           |          |                      |           |          |           | TT v GT+GG | 1.35 (0.92-1.99)             | 2.3      | 0.1283                   |
|           |          | N = 725              |           | N = 1434 |           |            |                              |          |                          |
| U.S.A.    | GG       | 111                  | 0.15      | 339      | 0.24      |            |                              |          |                          |
|           | GT       | 349                  | 0.48      | 723      | 0.50      | GT v GG    | 1.47 (1.15-1.89)             | 9.4      | 0.0022                   |
|           | TT       | 265                  | 0.37      | 372      | 0.26      | TT v GG    | 2.18 (1.67-2.83)             | 33.4     | 7.4 x 10 <sup>-9</sup>   |
|           |          |                      |           |          |           | TT v GT+GG | 1.64 (1.37-1.98)             | 26.1     | 3.2 x 10 <sup>-7</sup>   |
|           |          | N = 1661             |           | N = 2508 |           |            |                              |          |                          |
| All       | GG       | 283                  | 0.17      | 588      | 0.23      |            | <b>Pooled OR<sup>c</sup></b> |          | <b>Pooled P</b>          |
|           | GT       | 749                  | 0.45      | 1255     | 0.50      | GT v GG    | 1.27 (1.07-1.50)             |          | 0.0031                   |
|           | TT       | 629                  | 0.38      | 665      | 0.27      | TT v GG    | 2.01 (1.67-2.41)             |          | 3.7 x 10 <sup>-14</sup>  |
|           |          |                      |           |          |           | TT v GT+GG | 1.69 (1.48-1.94)             |          | 9.33 x 10 <sup>-15</sup> |

<sup>a</sup> P value, uncorrected for multiple tests, 1 degree of freedom

<sup>b</sup> Number of individuals

<sup>c</sup> Mantel-Haenszel test of pooled odds ratios and 95% confidence intervals
