# Supplementary material for: A common haplotype of interferon regulatory factor 5 (IRF5) regulates splicing and expression and is associated with increased risk of systemic lupus erythematosus
Source: Springer Nature journal article supplement (doi:10.1038/ng1782), 2006-04-16
Supplement: 41588_2006_BFng1782_MOESM2_ESM.pdf [file 41588_2006_BFng1782_MOESM2_ESM.pdf]

**Supplementary Table 2: Association of HapMap phase II variants to IRF-5 expression levels**

| Marker <sup>a</sup> | Chr | Position <sup>b</sup> | MAF <sup>c</sup> | r <sup>2</sup> to rs2280714 <sup>d</sup> | P <sup>e</sup>          |
|---------------------|-----|-----------------------|------------------|------------------------------------------|-------------------------|
| rs729302            | 7   | 128,122,922           | 0.32             | 0.09                                     | 0.2                     |
| rs2004640           | 7   | 128,132,263           | 0.49             | 0.68                                     | 6.0 x 10 <sup>-8</sup>  |
| rs752637            | 7   | 128,133,382           | 0.45             | 0.83                                     | 2.8 x 10 <sup>-9</sup>  |
| rs2280714           | 7   | 128,148,687           | 0.42             | -                                        | 1.0 x 10 <sup>-10</sup> |
| rs7789423           | 7   | 128,175,166           | 0.42             | 1.00                                     | 1.0 x 10 <sup>-10</sup> |
| rs6948928           | 7   | 128,177,059           | 0.42             | 1.00                                     | 1.0 x 10 <sup>-10</sup> |
| rs3857852           | 7   | 128,211,235           | 0.42             | 1.00                                     | 2.6 x 10 <sup>-10</sup> |
| rs13221560          | 7   | 128,217,133           | 0.39             | 1.00                                     | 7.4 x 10 <sup>-10</sup> |
| rs921403            | 7   | 128,230,682           | 0.43             | 0.97                                     | 4.0 x 10 <sup>-10</sup> |
| rs10279821          | 7   | 128,237,505           | 0.41             | 0.97                                     | 4.9 x 10 <sup>-10</sup> |
| rs10156169          | 7   | 128,238,529           | 0.42             | 0.93                                     | 3.4 x 10 <sup>-10</sup> |

<sup>a</sup> HapMap Phase II markers with P < 1.0 x 10<sup>-9</sup> are shown, in addition to the results for IRF-5 region markers genotyped in the SLE families (rs729302, rs2004640, rs752637)

<sup>b</sup> Position in HG16 (Build 34).

<sup>c</sup> Minor Allele Frequency in HapMap CEPH (CEU) population.

<sup>d</sup> Correlation to rs2280714.

<sup>e</sup> P calculated using conditional linear regression, testing variants for association to IRF-5 expression in EBV-transformed B cells from CEPH individuals.
