# Supplementary material for: A common haplotype of interferon regulatory factor 5 (IRF5) regulates splicing and expression and is associated with increased risk of systemic lupus erythematosus
Source: Springer Nature journal article supplement (doi:10.1038/ng1782), 2006-04-16
Supplement: 41588_2006_BFng1782_MOESM3_ESM.pdf [file 41588_2006_BFng1782_MOESM3_ESM.pdf]

**Supplementary Table 3: IRF-5 haplotype frequency in SLE cases and controls**

|           |   | Haplotype <sup>a</sup> |           | Cases                | Frequency | Controls | Frequency | $\chi^2$ | P <sup>b</sup>               |
|-----------|---|------------------------|-----------|----------------------|-----------|----------|-----------|----------|------------------------------|
|           |   | rs2004640              | rs2280714 |                      |           |          |           |          |                              |
|           |   |                        |           | N <sup>c</sup> = 282 |           | N = 262  |           |          |                              |
| Argentina | T | T                      |           | 303                  | 0.54      | 227      | 0.43      | 11.8     | 0.0006                       |
|           | G | T                      |           | 54                   | 0.10      | 70       | 0.13      | 3.8      | 0.0501                       |
|           | G | C                      |           | 205                  | 0.36      | 224      | 0.43      | 4.7      | 0.0309                       |
|           |   |                        |           | N = 350              |           | N = 527  |           |          |                              |
| Spain     | T | T                      |           | 419                  | 0.60      | 547      | 0.52      | 10.8     | 0.0010                       |
|           | G | T                      |           | 109                  | 0.16      | 167      | 0.16      | 0.0      | 0.9212                       |
|           | G | C                      |           | 155                  | 0.22      | 316      | 0.30      | 13.2     | 0.0003                       |
|           | T | C                      |           | 17                   | 0.02      | 25       | 0.02      | 0.0      | 0.9366                       |
|           |   |                        |           | N = 82               |           | N = 93   |           |          |                              |
| Sweden    | T | T                      |           | 99                   | 0.60      | 109      | 0.59      | 0.1      | 0.7514                       |
|           | G | T                      |           | 29                   | 0.18      | 32       | 0.17      | 0.2      | 0.6642                       |
|           | G | C                      |           | 36                   | 0.22      | 44       | 0.24      | 0.0      | 0.9431                       |
|           |   |                        |           | N = 649              |           | N = 1405 |           |          |                              |
| U.S.A.    | T | T                      |           | 780                  | 0.60      | 1422     | 0.51      | 32.0     | 1.6 x 10 <sup>-8</sup>       |
|           | G | T                      |           | 162                  | 0.13      | 413      | 0.15      | 3.5      | 0.0599                       |
|           | G | C                      |           | 348                  | 0.27      | 961      | 0.34      | 22.1     | 2.6 x 10 <sup>-6</sup>       |
|           |   |                        |           | N = 1358             |           | N = 2278 |           |          | <b>Pooled P <sup>d</sup></b> |
| ALL       | T | T                      |           | 1601                 | 0.59      | 2305     | 0.51      |          | 1.9 x 10 <sup>-13</sup>      |
|           | G | T                      |           | 354                  | 0.13      | 682      | 0.15      |          | 0.9842                       |
|           | G | C                      |           | 744                  | 0.27      | 1545     | 0.34      |          | 2.5 x 10 <sup>-10</sup>      |
|           | T | C                      |           | 17                   | 0.01      | 25       | 0.01      |          | 0.9366                       |

<sup>a</sup> Haplotype of rs2004640 and rs2280714, phased using Haploview software. Only samples with complete genotype data were analyzed.

<sup>b</sup> P value, uncorrected for multiple tests, 1 degree of freedom

<sup>c</sup> Number of individuals

<sup>d</sup> Pooled P value from Mantel-Haenszel test of pooled odds ratios
