# Supplementary material for: A common haplotype of interferon regulatory factor 5 (IRF5) regulates splicing and expression and is associated with increased risk of systemic lupus erythematosus
Source: Springer Nature journal article supplement (doi:10.1038/ng1782), 2006-04-16
Supplement: 41588_2006_BFng1782_MOESM4_ESM.pdf [file 41588_2006_BFng1782_MOESM4_ESM.pdf]

**Supplementary Table 4: Hardy-Weinberg Equilibrium Expectation Test in Control Samples**

| Population | rs2004640<br>P <sup>a</sup> | rs2280714<br>P |
|------------|-----------------------------|----------------|
| Argentina  | 0.59                        | 0.76           |
| Spain      | 0.95                        | 0.20           |
| Sweden     | 0.54                        | 0.63           |
| USA        | 0.73                        | 0.68           |

<sup>a</sup> P value for deviation from genotype frequencies predicted under Hardy-Weinberg Equilibrium expectations
