# Supplementary material for: A common haplotype of interferon regulatory factor 5 (IRF5) regulates splicing and expression and is associated with increased risk of systemic lupus erythematosus
Source: Springer Nature journal article supplement (doi:10.1038/ng1782), 2006-04-16
Supplement: 41588_2006_BFng1782_MOESM5_ESM.pdf [file 41588_2006_BFng1782_MOESM5_ESM.pdf]

**Supplementary Table 5: Primer sequences**  
**Primer sequences used in genotyping assays**

| SNP       | Genotyping Technology | Forward Primer                 | Reverse Primer                 | Extension Primer                                                                                |
|-----------|-----------------------|--------------------------------|--------------------------------|-------------------------------------------------------------------------------------------------|
| rs729302  | Sequenom              | AGCGGATAACAAATAGACCAGAGACCAGGG | AGCGGATAACAAGTCTAAGTGAGTGGCAGG | ATGGGACAAGGTGAAGAC                                                                              |
| rs2004640 | Sequenom              | AGCGGATAACAGGCGCTTTGGAAGTCCCAG | AGCGGATAACATGAAGACTGGAGTAGGGCG | CCCTGCTGTAGGCACCC                                                                               |
| rs752637  | Sequenom              | AGCGGATAACTCTAAAGGCCCTACTTTGGG | AGCGGATAACAAAGGTGCCAGAAAGAAGC  | CTGACCCTGGGAGGAAGC                                                                              |
| rs2280714 | Sequenom              | AGCGGATAACCCATAAATTCTGACCCTGGC | AGCGGATAACAGGAGGAGTAAGCAAGGAAC | TTCTGACCCTGGCAGGTCC                                                                             |
| rs2004640 | TaqMan*               | CAGCTGCGCCTGGAAAAG             | GGGAGGCGCTTTGGAAGT             | VIC : TGTAGGCACCCCCCG<br>FAM:TGTAGGCACCCACCCG<br>VIC: CTTCTTTCAGCTTCCTC<br>FAM: TCTTTCGGCTTCCTC |
| rs752637  | TaqMan                | GCAAAAGGTGCCAGAAAGAAG          | TCCCCTGTACCCTGGTCTTC           | VIC: CTTCTTTCAGCTTCCTC<br>FAM: TCTTTCGGCTTCCTC                                                  |

**Primer sequences used for 5'UTR exon1 isoform transcript detection**

| Exon | Specific forward primer | Common reverse primer (exon 3)    | Common TaqMan probe               |
|------|-------------------------|-----------------------------------|-----------------------------------|
| 1A   | ACGCAGGCGCACCGCAGACA    | TCGTAGATCTGTAGGGCTGAGGTGGCA       | CCATGAACCAAGTCCATCCCAGTGGCTCCCACC |
| 1B   | AGCTGCGCCTGGAAAGCGAGC   |                                   |                                   |
| 1C   | AGGCGGCACTAGGCAGGTGCAAC |                                   |                                   |
|      |                         | Common reverse primer (exon 8)    |                                   |
|      |                         | GAAACTTGATCTCCAGGTCGGTCA          |                                   |
|      |                         | Common reverse primer (last exon) |                                   |
|      |                         | CTGAGAACATCTCCAGCAGCAG            |                                   |

\*Primer sequences for rs2280714 are not available as these were ordered through the ABI assay-on-demand. The assay number is C\_\_\_2691243\_1\_
